# Supplementary material for: Smoking-induced gene expression changes in the bronchial airway are reflected in nasal and buccal epithelium
Source: PubMed Central journal article supplement (PMC2435556; doi:10.1186/1471-2164-9-259), 2008-05-30
Supplement: 1471-2164-9-259-S2.pdf [file 1471-2164-9-259-S2.pdf]

**Bronch genes differentially expressed in smokers**  
361 probesets => **314** unique genes

**206 genes UP** in smokers

**108 genes DOWN** in smokers

**74 genes**  
enriched in  
*buccal* mucosa smokers  
(leading edge subset)

**120 genes**  
enriched in  
*nasal* mucosa smokers  
(leading edge subset)

**50 genes**  
enriched in  
*nasal* mucosa never smokers  
(leading edge subset)

**45 genes**  
in common between  
leading edge subsets
